# Supplementary material for: The Perceived Impact of The First UK COVID-19 Lockdown on Companion Animal Welfare and Behaviour: A Mixed-Method Study of Associations with Owner Mental Health
Source: MDPI journal article supplement (doi:10.3390/ijerph18116171), 2021-06-07
Supplement: s1 [file s1]

**Supplementary Table S1.** Measure of perceived changes in companion animal's welfare and behaviour

|                                                                                                                                                    |                                                                            |
|----------------------------------------------------------------------------------------------------------------------------------------------------|----------------------------------------------------------------------------|
| <b>Have you noticed any of the following changes in your animal's behaviour since the social distancing measures started? Mark all that apply.</b> | My animal seems more relaxed                                               |
|                                                                                                                                                    | My animal seems more unsettled                                             |
|                                                                                                                                                    | My animal is more affectionate                                             |
|                                                                                                                                                    | My animal is more sociable than before                                     |
|                                                                                                                                                    | My animal is quieter/more withdrawn than before                            |
|                                                                                                                                                    | My animal is more wary or hostile towards me or family members than before |
|                                                                                                                                                    | My animal seems more anxious/easily scared                                 |
|                                                                                                                                                    | My animal is following me around more                                      |
|                                                                                                                                                    | My animal is following me around less                                      |
|                                                                                                                                                    | My animal seems more energetic or playful than before                      |
|                                                                                                                                                    | My animal's appetite seems to have increased                               |
|                                                                                                                                                    | My animal has lost its appetite                                            |
|                                                                                                                                                    | My animal has lost weight                                                  |
|                                                                                                                                                    | My animal has gained weight                                                |
|                                                                                                                                                    | My animal's physical condition (e.g. coat/feathers) seems to have improved |
|                                                                                                                                                    | My animal's physical condition (e.g. coat/feathers) seems to have worsened |
|                                                                                                                                                    | Other (please specify): _____                                              |
|                                                                                                                                                    | There have been no changes in my animal's behaviour                        |
